# Supplementary material for: Defining hypoxemia from pulse oximeter measurements of oxygen saturation in well children at low altitude in Bangladesh: an observational study
Source: bioRxiv or medRxiv preprint supplement (doi:10.1101/2021.06.15.21258979), 2021-06-23

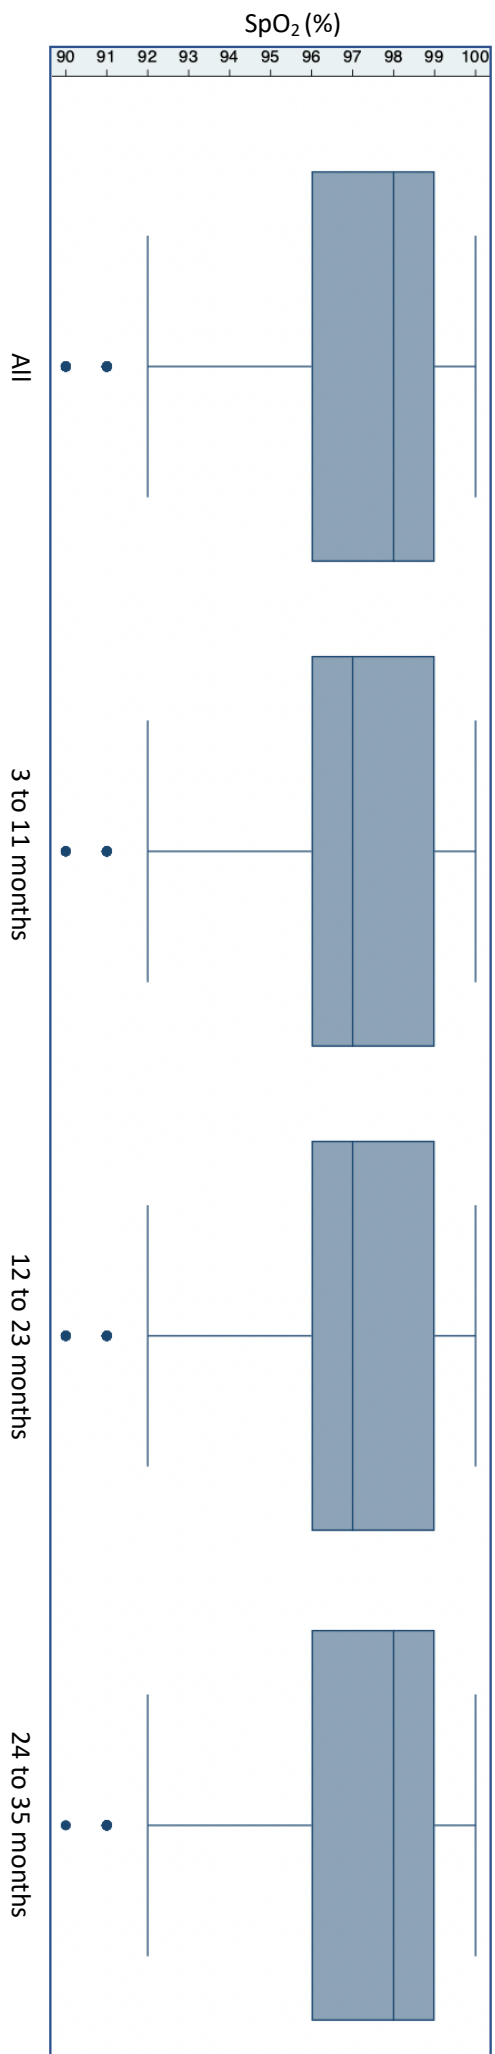

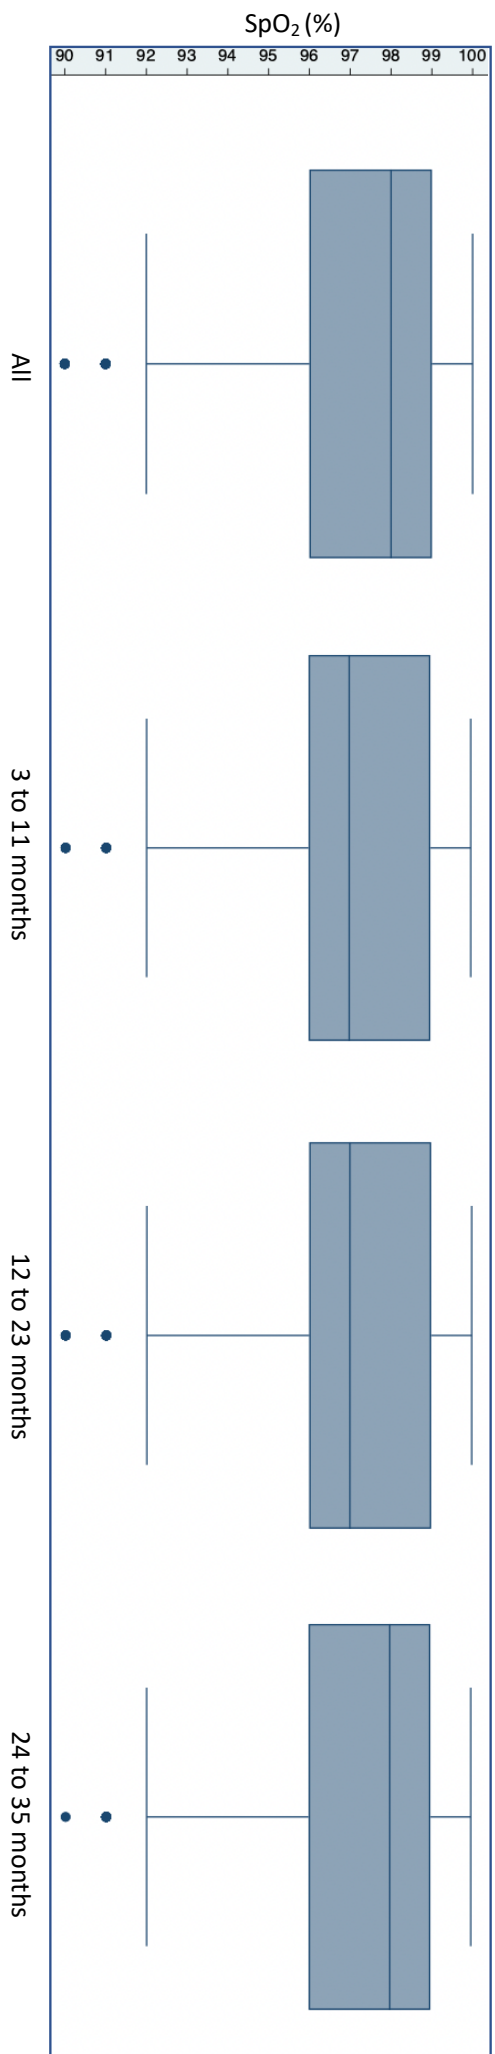

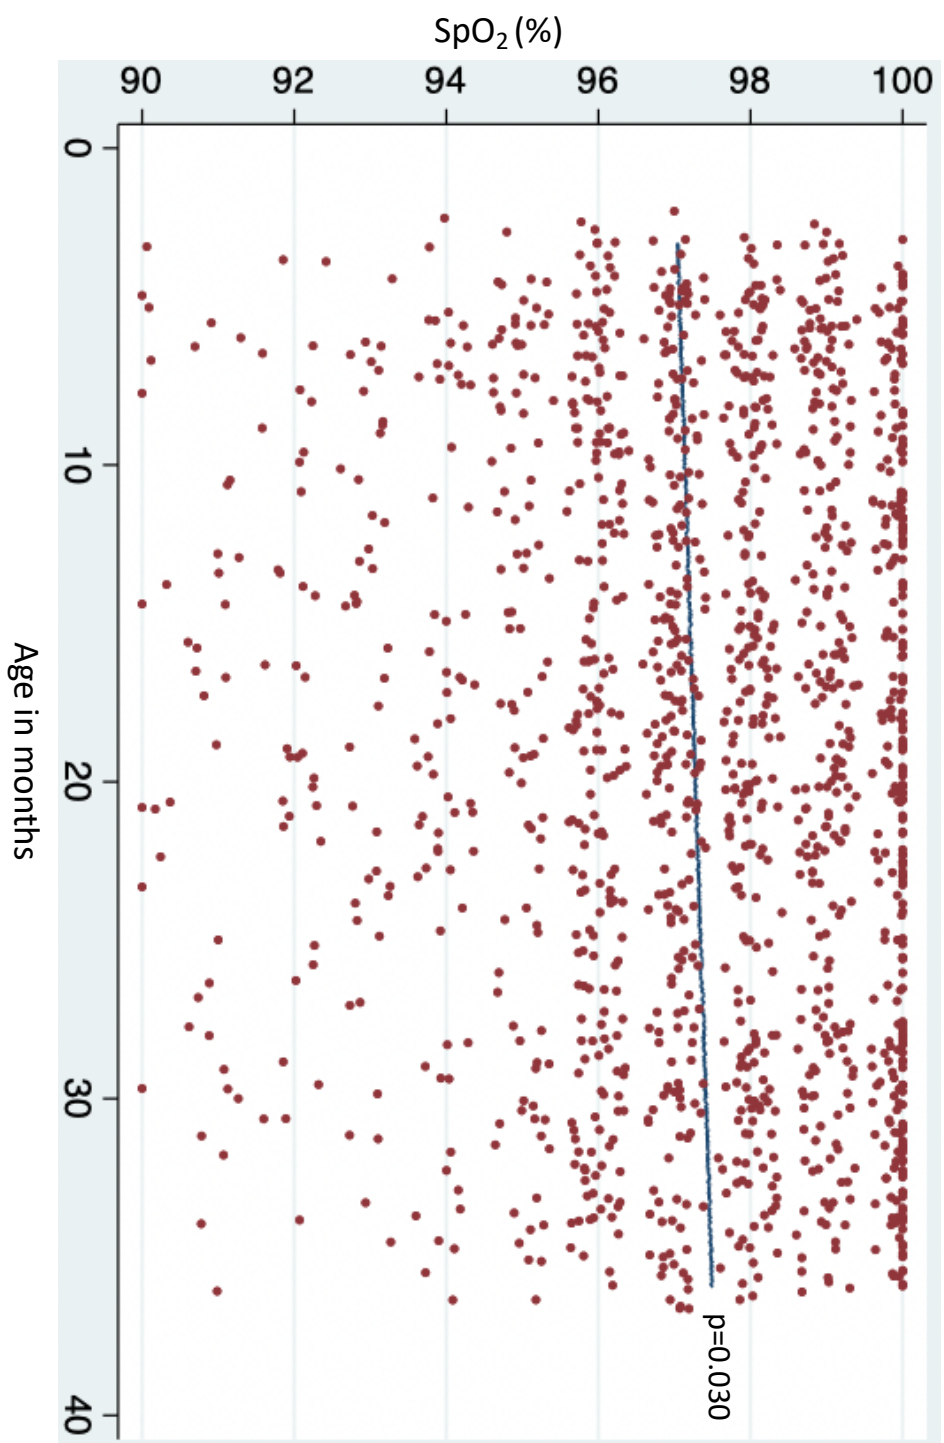

Supplement: Supplementary file [file media-1.pdf]
